# Supplementary material for: Anti-nuclear Antibody and a Granuloma Could be Biomarkers for iCIs-related Hepatitis by Anti- PD-1 Treatment
Source: Research Square preprint supplement (doi:10.21203/rs.3.rs-831424/v1), 2021-08-26
Supplement: Supplementary file 1 [file 3541e94a62de530645538449.xlsx]

## Sheet: Sheet1
	Table 1
	Background of lung cancer patients treated by nivolumab
					Nivoloumab without iCIs-relaed hepatitis		Nivolumab with iCIs-relaed hepatitis
					(Without ALT elevation)		(With ALT elevation)
		Subjects			108		78		n.a.
		Age (Average)			69.9		68.9		n.s.
		Sex (Male/Female)			(82/26)		(65/13)		p<0.0001
		Type of Lung Cancer (Adenocarcinoma/Squemas cell Carcinoma/Other)			(64/39/5)		(42/33/3)		n.s.
		Liver Damage (G1/G2/G3/G4)			NA		(54/12/10/2)		n.a.
		Peak T-bil average (SD)			1.1 (1.38)		2.0 (3.38)		p=0.0304
		Peak ALT average (SD)			34.8 (25.0)		228.4 (443.5)		p=0.0003
		Peak ALP average (SD)			501 (390.7)		869 (855.8)		p=0.0007
		Treatments for liver damage (Observation/SNMC/Steroid/Steroid-pulse/Steroid+Azatiopline)			NA		(66/5/4/0/3)		n.a.
		HBsAg (positive/negative)			(1/107)		(1/77)		n.s.
		Anti-nuclear antibody （positve/negative)			(31/77)		(30/48)		p<0.0001
		Anti-mitochondria antibody （positve/negative)			(3/105)		(2/76)		n.s.
		IgG average (SD)			1362 (475)		1424 (509)		p=0.41
		IgM average (SD)			83.5 (45.7)		87.6 (51.5)		p=0.59
		SD means standard deviation.
